# Supplementary material for: Facile construction of nanoscale laminated Na3V2(PO4)3for a high-performance sodium ion battery cathode
Source: Royal Society of Chemistry journal article supplement (doi:10.1039/c6ta07109k), 2016-01-01
Supplement: c6ta07109k1.pdf [file c6ta07109k1.pdf]

## Supporting Information

### Facile Construction of Nanoscale Laminated $\text{Na}_3\text{V}_2(\text{PO}_4)_3$ for High-performance Sodium Ion Battery Cathode

Qiong Zheng<sup>a</sup>, Xianfeng Li<sup>a,c</sup>, Hongzhang Zhang<sup>a,c</sup>, Kai Feng<sup>a\*</sup>, Huamin Zhang<sup>a,c\*</sup>

<sup>a</sup> Division of energy storage, Dalian Institute of Chemical Physics, Chinese Academy of Sciences, Zhongshan Road 457, Dalian 116023, China

<sup>b</sup> University of Chinese Academy of Sciences, Beijing 100039, China

<sup>c</sup> Collaborative Innovation Center of Chemistry for Energy Materials (iChEM), Dalian 116023, P. R. China

\*Correspondence - zhengqiong@dicp.ac.cn

**Table S1.** The lattice parameters of G-NVP and X-NVP

|                  | G-NVP    | X-NVP    |
|------------------|----------|----------|
| cell_length_a    | 8.72482  | 8.72315  |
| cell_length_b    | 8.72482  | 8.72315  |
| cell_length_c    | 21.8351  | 21.8301  |
| cell_angle_alpha | 90       | 90       |
| cell_angle_beta  | 90       | 90       |
| cell_angle_gamma | 120      | 120      |
| cell_volume      | 1439.46  | 1438.57  |
| setting          | trigonal | Trigonal |
| space_group      | R-3c     | R-3c     |

**Table S2.** Crystallographic data of the G-NVP

| atom | site | x        | y       | Z        | occupancy |
|------|------|----------|---------|----------|-----------|
| Na   | Na1  | 0.3333   | 0.6667  | 0.1667   | 0.862     |
| Na   | Na2  | 0.6667   | 0.9708  | 0.0833   | 0.7681    |
| V    | V1   | 0.3333   | 0.6667  | 0.01926  | 1         |
| P    | P1   | -0.04337 | 0.3333  | 0.0833   | 1         |
| O    | O1   | 0.14038  | 0.49886 | 0.07741  | 1         |
| O    | O2   | 0.53971  | 0.84147 | -0.02467 | 1         |

**Table S3.** Crystallographic data of the X-NVP

| atom | site | x        | Y       | Z        | occupancy |
|------|------|----------|---------|----------|-----------|
| Na   | Na1  | 0.3333   | 0.6667  | 0.1667   | 0.846     |
| Na   | Na2  | 0.6667   | 0.9694  | 0.0833   | 0.7655    |
| V    | V1   | 0.3333   | 0.6667  | 0.01930  | 1         |
| P    | P1   | -0.04389 | 0.3333  | 0.0833   | 1         |
| O    | O1   | 0.14009  | 0.49923 | 0.07758  | 1         |
| O    | O2   | 0.53974  | 0.84156 | -0.02430 | 1         |

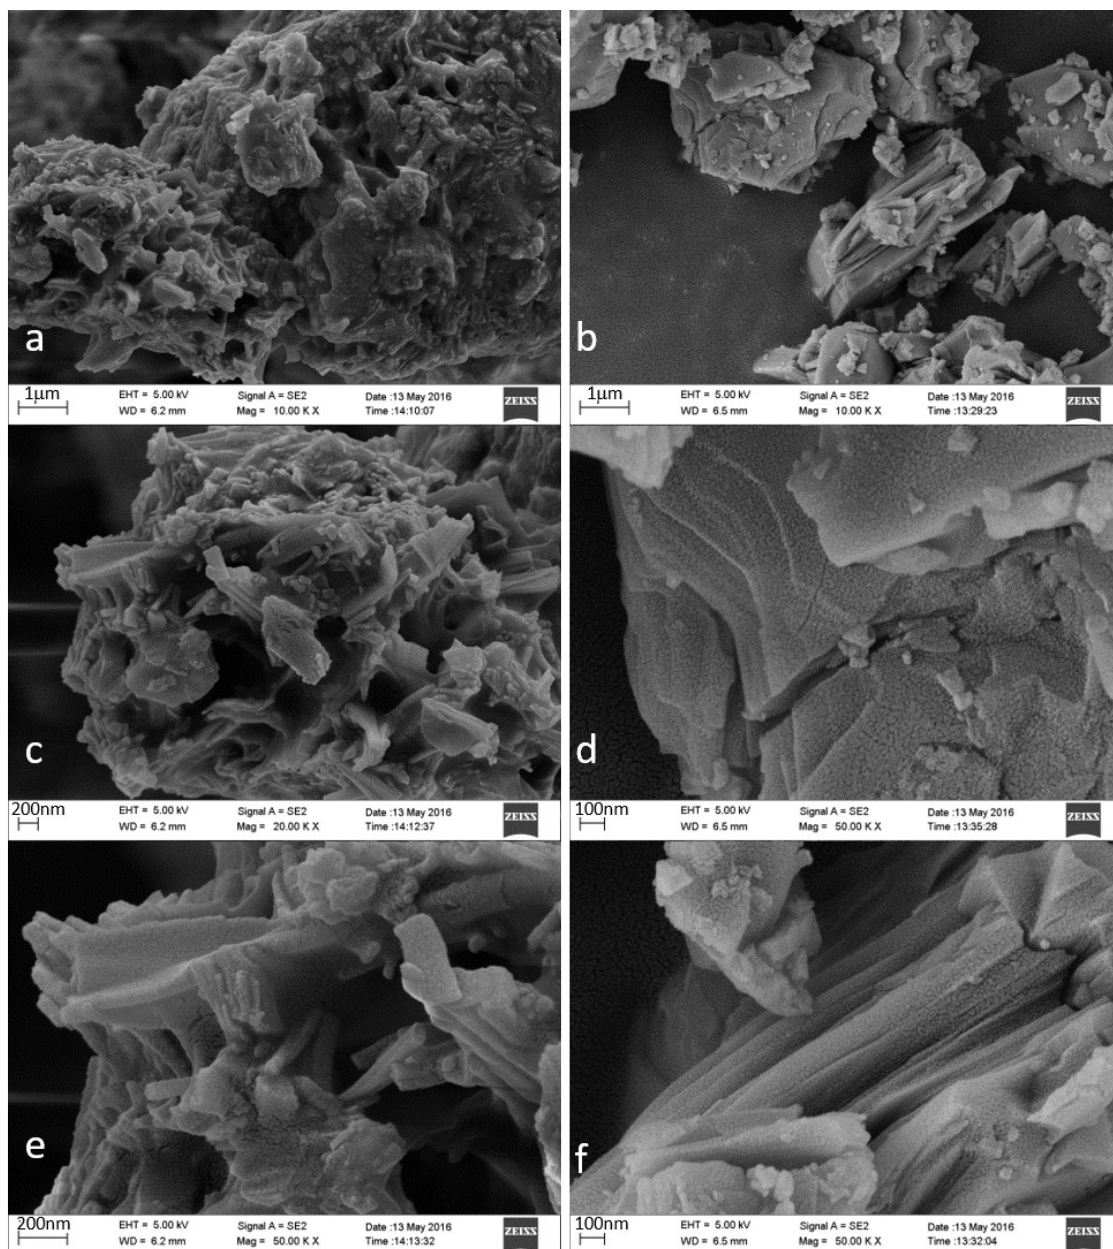

**Fig. S1.** SEM images of the intermediate precursor of G-NVP (a) (c) (e) and X-NVP (b) (d) (f) with different magnifications.

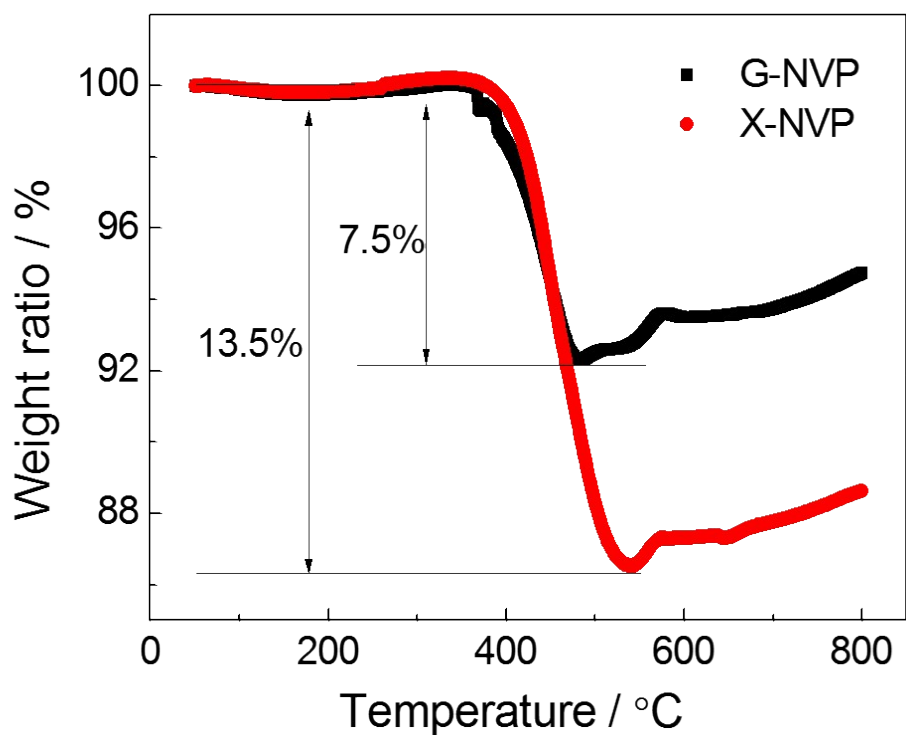

Fig. S2. TG curves of G-NVP and X-NVP

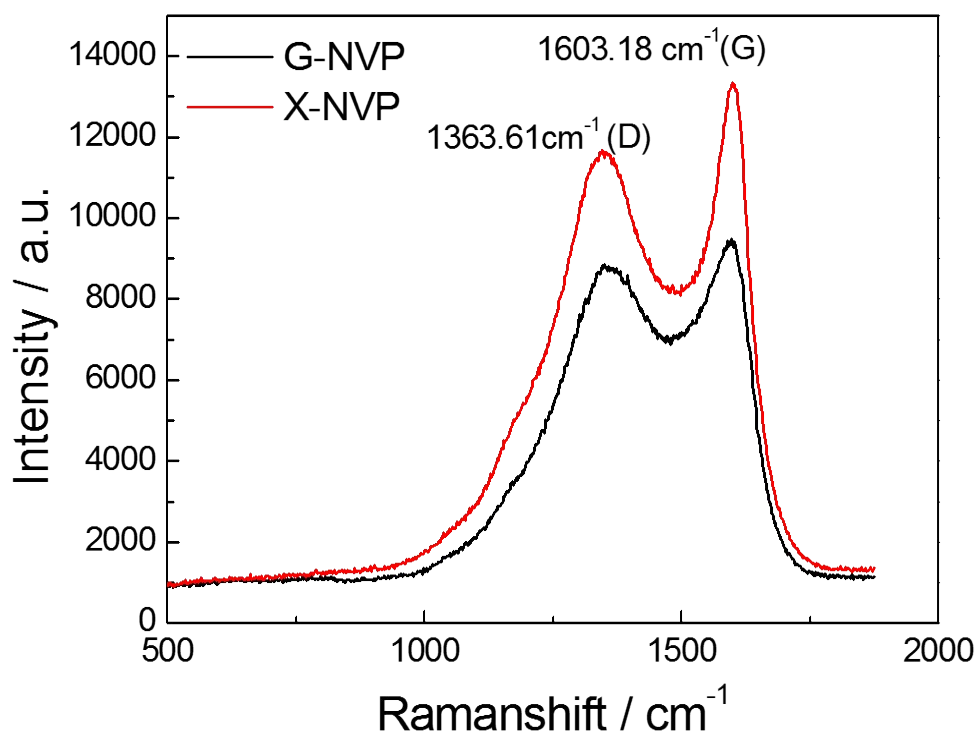

Fig. S3. Raman spectra of G-NVP and X-NVP
